## P1509

## Obesity and diastolic function of the left ventricle by echocardiography in a Mediterranean child population

Aristizabal Duque C.<sup>1</sup>; Fernandez Cabeza J.<sup>1</sup>; Blancas Sanchez IM.<sup>1</sup>; Ruiz Ortiz M.<sup>1</sup>; Delgado Ortega M.<sup>1</sup>; Rodriguez Almodovar A.<sup>1</sup>; Romo Pena E.<sup>1</sup>; Fonseca Del Pozo FJ.<sup>2</sup>; Romero Sardana M.<sup>3</sup>; Pan Alvarez Osorio M.<sup>1</sup>; Mesa Rubio D.<sup>1</sup>

<sup>1</sup>University Hospital Reina Sofia, Cordoba, Spain

<sup>2</sup>Hospital San Juan de Dios, cordoba, Spain

<sup>3</sup>Ayuntamiento de cordoba, cordoba, Spain

**Background:** The prevalence of overweight in childhood is 26% and obesity is 12.6% in Spain. Diastolic function assessed with echocardiography shows significant worsening in obese adults compared to non-obese adults. However, few studies describe the association between obesity and diastolic function in the pediatric population.

**Aim:** To investigate the relationship between obesity and diastolic function in a Mediterranean pediatric population.

**Methods:** A random sample of children and adolescents of primary and secondary education was selected, stratifying by age, gender and educational centers in a rural town of 2864 inhabitants of southern Spain. Children between 6 and 17 years old were included. A transthoracic echocardiogram was performed to evaluate diastolic function.

**Results:** A total of 212 children were studied (10.9 ± 3.0 years old and 51.9% males): 163 (76.9%) were not obese and 49 (23.1%) were obese. Age and sex were similar in both groups. Results are shown in the table. Obesity was related to a larger left atrial volume, a higher A-wave velocity, a lower lateral e' wave velocity, a higher average E/e' ratio, and a higher pressure gradient between the atrium and the right ventricle.

**Conclusions:** Obesity in childhood is associated to worsening of diastolic function parameters commonly measured in echocardiography.

Obese Vs non-Obese

|                            | non-obese    | obese        | p       |
|----------------------------|--------------|--------------|---------|
| Age                        | 10,8 ± 3,0   | 11,0 ± 2,8   | 0,63    |
| Male (%)                   | 50,1%        | 57,1%        | 0,4     |
| A-wave velocity (cm/s)     | 58,7 ± 13,1  | 64,8 ± 13,8  | 0,005   |
| E/A                        | 1,89 ± 0,45  | 1,75 ± 0,41  | 0,05    |
| lateral e" velocity (cm/s) | 21,26 ± 4,61 | 19,58 ± 3,97 | 0,02    |
| average E/e"               | 6,4 ± 1,1    | 7,0 ± 1,2    | 0,001   |
| left atrial volume (mL)    | 20,8 ± 6,8   | 27,9 ± 7,4   | <0,0005 |
| pressure gradient (mmHg)   | 15,5 ± 4,5   | 18,0 ± 4,9   | 0,02    |
